# Supplementary material for: Genetic and Sex-Specific Transgenerational Effects of a High Fat Diet in Drosophila melanogaster
Source: PubMed Central journal article supplement (PMC4982694; doi:10.1371/journal.pone.0160857), 2016-08-12
Supplement: pone.0160857.s002.pdf [file pone.0160857.s002.pdf]

Supplemental Information: Genetic and Sex-specific Transgenerational Effects of a High Fat Diet  
in *Drosophila melanogaster*

Kelly Dew-Budd<sup>1,2</sup>, Julie Jarnigan<sup>1</sup>, and Laura K. Reed<sup>1\*</sup>

<sup>1</sup> Department of Biological Sciences, University of Alabama; Tuscaloosa, AL, USA <sup>2</sup> School of  
Plant Sciences, University of Arizona; Tucson, AZ, USA

\*Corresponding author

E-mail: lreed1@ua.edu (LKR)

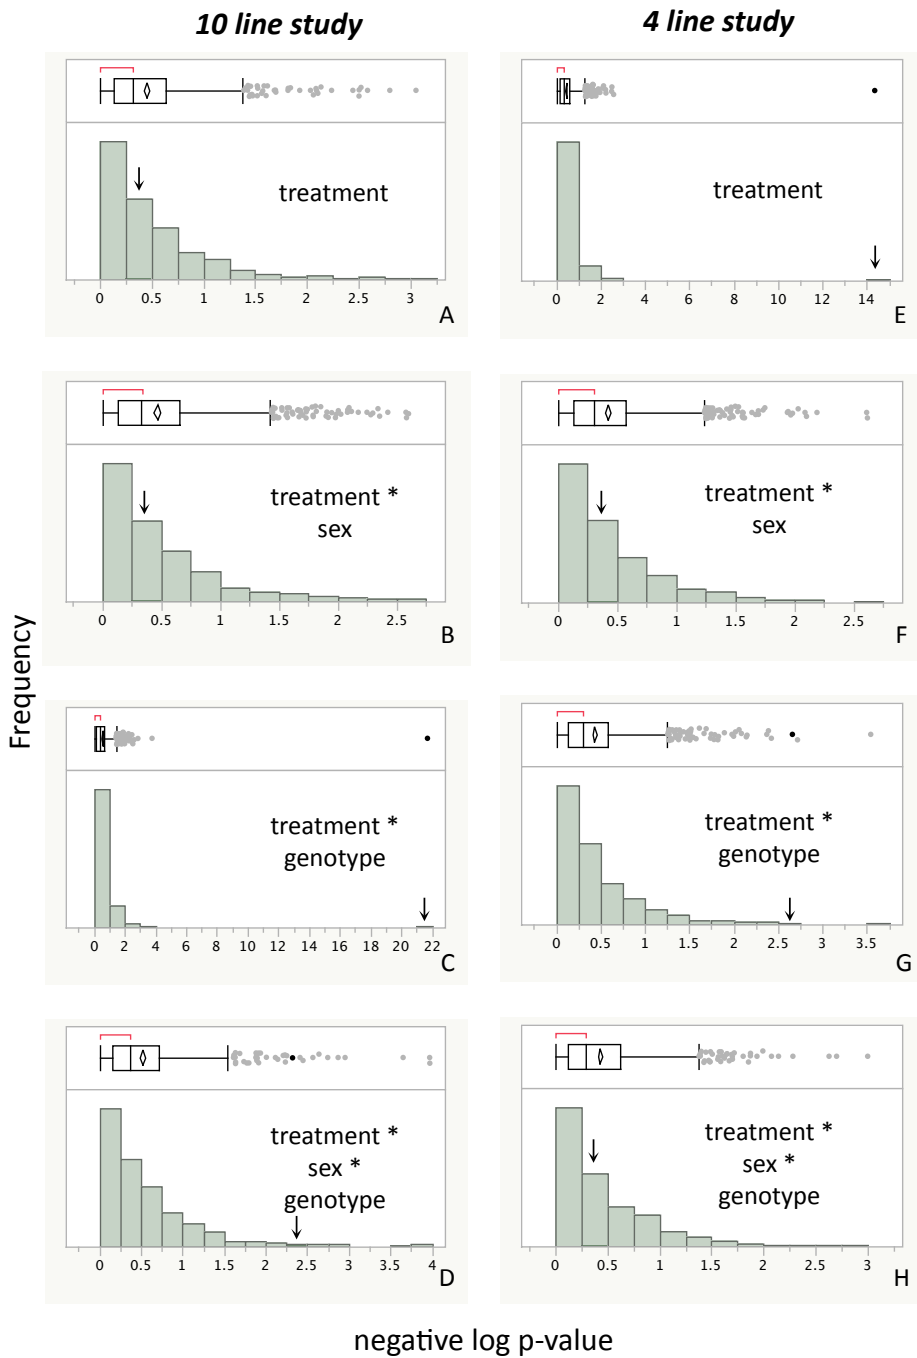

**Figure A. Parental generation distribution of p-values for ANOVA effects with permutation support significance of treatment effects.** Arrows indicate actual p-values. Distributions based on 1024 permutations within genetic line and sex to randomize treatment effects. Genetic line and sex distributions not shown since they remain highly significant under the permutation model. A-D are derived from the **10 line study** while E-H are derived from the fall and spring replicates of the **4 line study**. A and E are treatment main effects, B and F are the treatment interaction with sex, C and G are the treatment interaction with genetic line, and D and H are the three way interaction between treatment, genetic line, and sex.

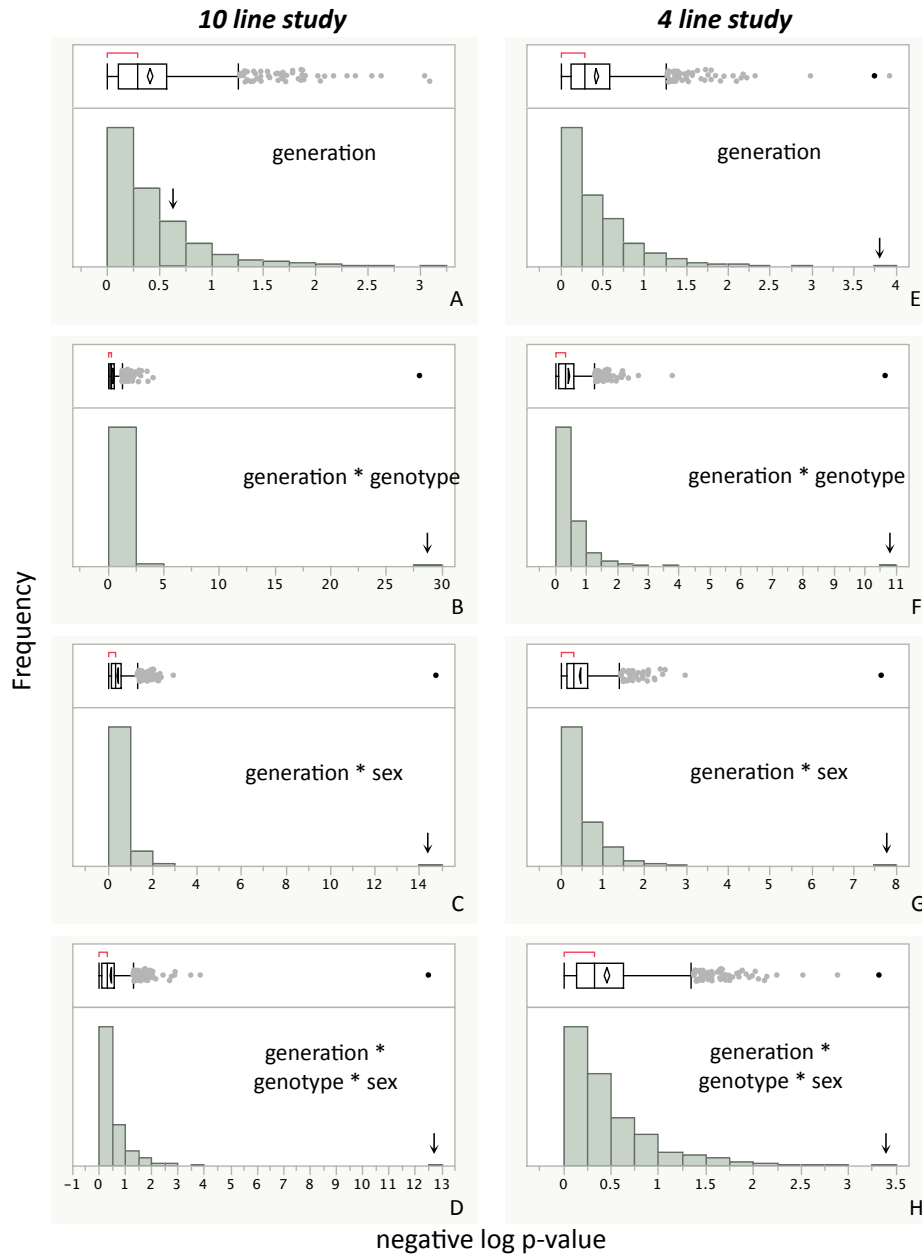

**Figure B. F1 and F2 generation distribution of p-values for ANOVA effects with permutation support significance of effects other than treatment.** Arrows indicate actual p-values. Distributions based on 1024 permutations within genetic line and sex to randomize treatment effects. Genetic line and sex distributions not shown since they remain highly significant under the permutation model. A-D are derived from the **10 line study** while E-H are derived from the fall and spring replicates of the **4 line study**. A and E are generation main effects, B and F are the generation interaction with genetic line, C and G are the generation interaction with sex, and D and H are the three way interaction between generation, genetic line, and sex.

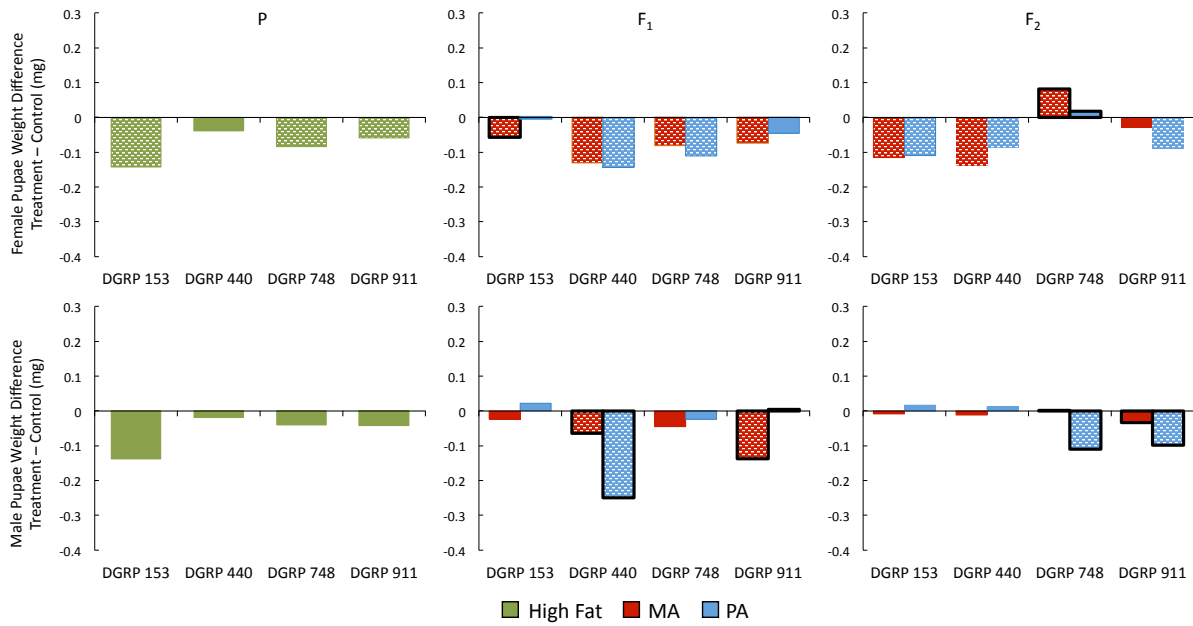

**Figure C. Weight 4 Line Study Data.** Polka dots indicate treatment is significantly different from Control. Black border indicates treatments are significantly different from each other. Multiple testing was corrected using false discovery rate of 0.05.

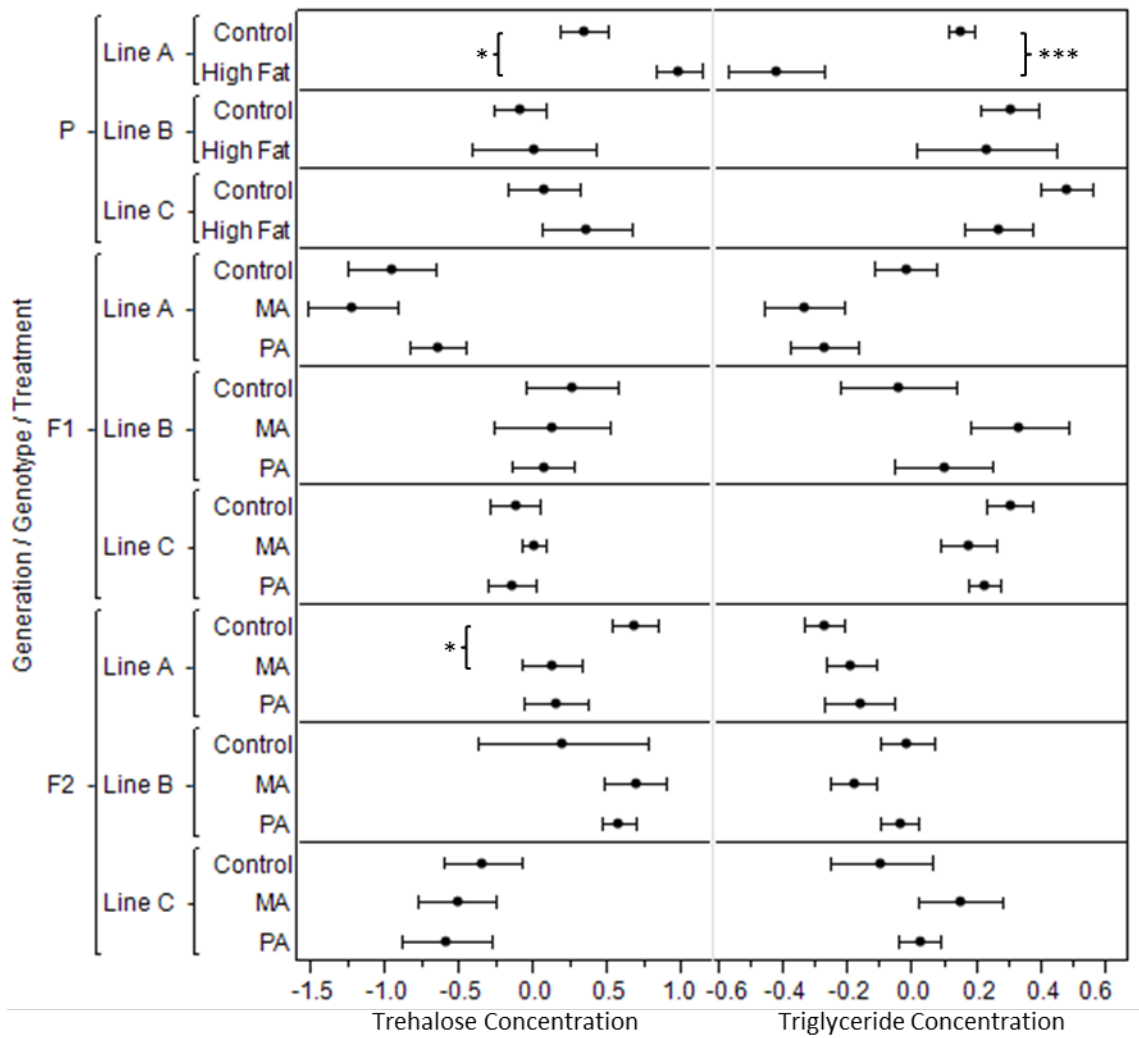

**Figure D. Trehalose and triglyceride concentrations (mean  $\pm$  SE) of Control, High Fat, Maternal Ancestor (MA), and Paternal Ancestor (PA) for three generations.** Raw data was log transformed and the residuals for batch effects are graphed. Triglycerides were corrected for protein concentration of the sample. Significance values indicated ( $p < 0.05$  \*,  $p < 0.01$  \*\*,  $p < 0.001$  \*\*\*).

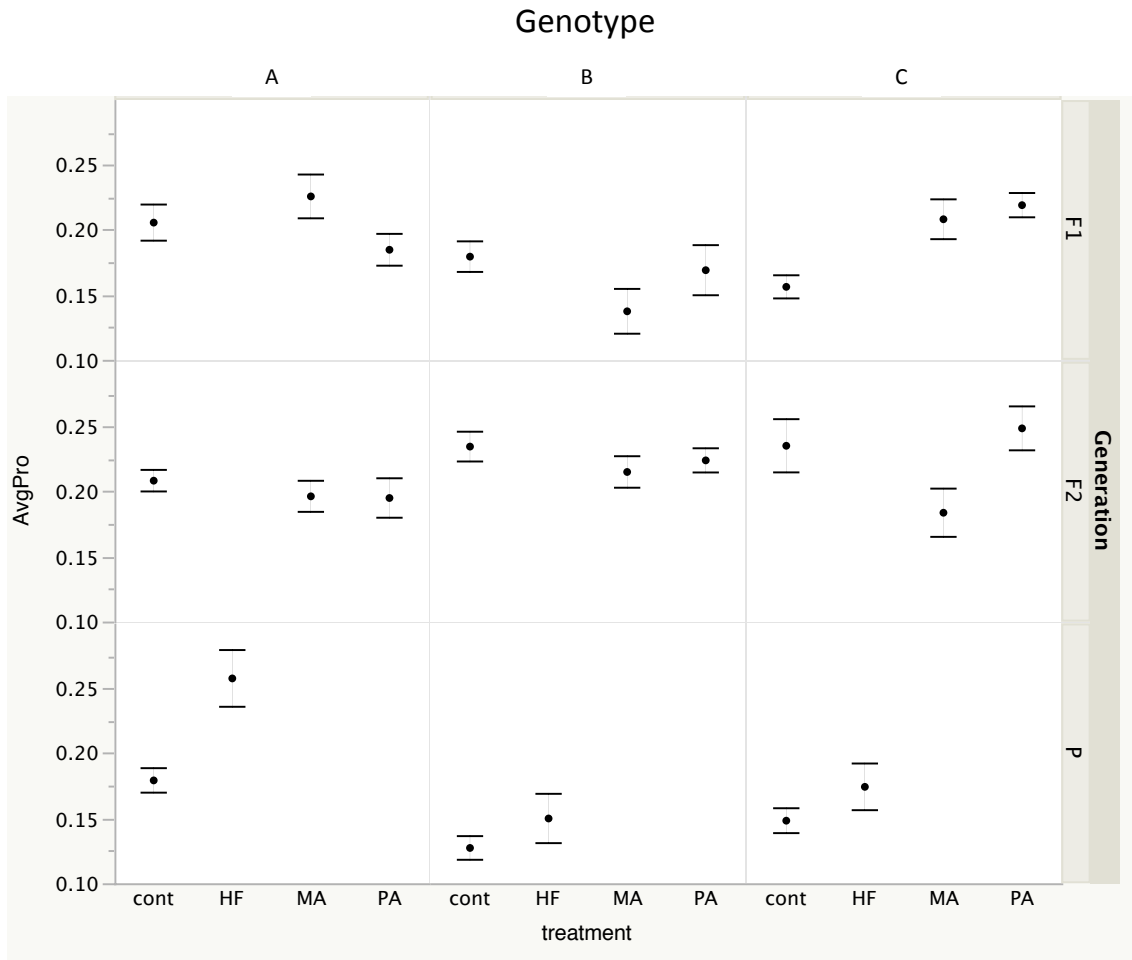

**Figure E. Protein concentrations (mean ± SE) of Control, High Fat, Maternal Ancestor (MA), and Paternal Ancestor (PA) for three generations.**

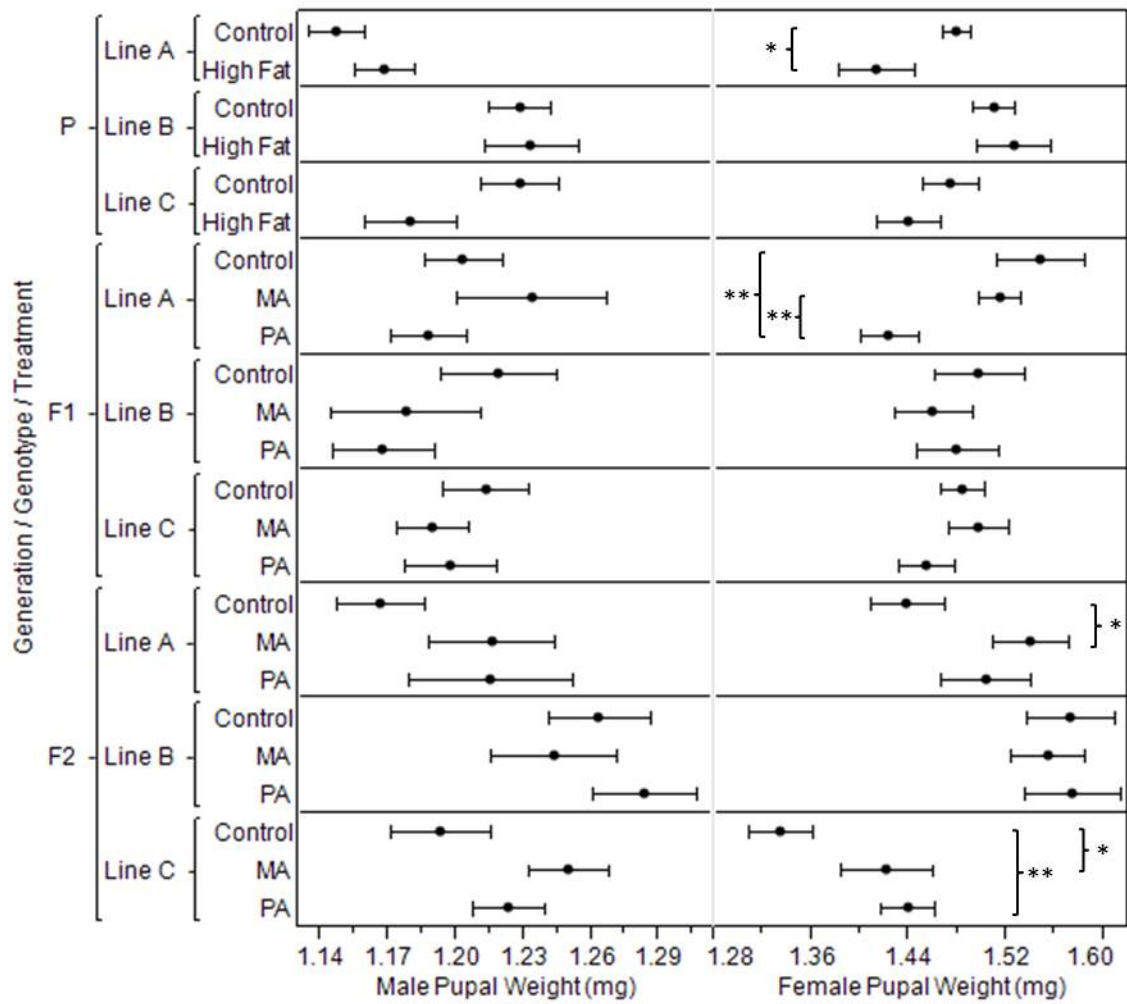

Figure F. Wet male and female pupal weight (mean  $\pm$  SE) of Control, High Fat, Maternal Ancestor (MA), and Paternal Ancestor (PA) for three generations. Significance values indicated ( $p < 0.05$  \*,  $p < 0.01$  \*\*).

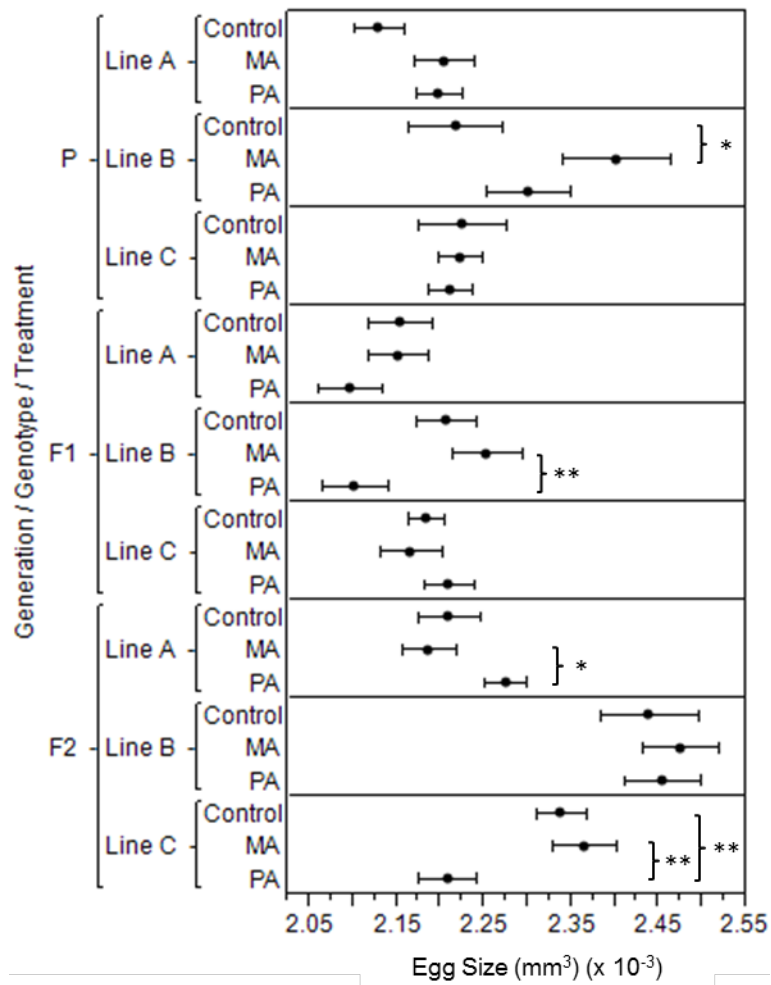

Figure G. Egg Size (mean  $\pm$  SE) of Control, High Fat, Maternal Ancestor (MA), and Paternal Ancestor (PA) for three generations. Significance values indicated ( $p < 0.05$  \*,  $p < 0.01$  \*\*).



**Table A. Parental generation variance partition for pupal weight.**

| <u>Effect</u> <sup>1</sup> | <u>10 line study</u> variance explained <sup>2</sup> | <u>NLP</u> <sup>3</sup> | <u>4 line study</u> variance explained <sup>4</sup> | <u>NLP</u> <sup>3</sup> |
|----------------------------|------------------------------------------------------|-------------------------|-----------------------------------------------------|-------------------------|
| Genotype                   | 0.2179                                               | 114.4<br>5              | 0.2595                                              | 134.9<br>0              |
| Treatment                  | 0.0001                                               | <i>ns</i>               | 0.0166                                              | 14.92                   |
| Sex                        | 0.5326                                               | 203.9<br>6              | 0.5278                                              | 207.4<br>9              |
| Treatment*Genotype         | 0.0308                                               | 20.72                   | 0.0036                                              | 2.65                    |
| Sex*Genotype               | 0.0149                                               | 9.05                    | 0.0094                                              | 7.33                    |
| Treatment*Sex              | 0.0000                                               | <i>ns</i>               | 0.0004                                              | <i>ns</i>               |
| Treatment*Sex*Genotype     | 0.0047                                               | 1.75                    | 0.0003                                              | <i>ns</i>               |
| time replicate             | <i>na</i>                                            | <i>na</i>               | 0.0101                                              | 9.50                    |

<sup>1</sup> ANOVA model effects, <sup>2</sup> variance in **10 line study** <sup>3</sup> negative log p-value; *ns*, non-significant, <sup>4</sup> variance in the **4 line study**

**Table B. Egg size and pupal weight correlations.** Correlation reported as  $R^2$ -value with +/- sign representing the direction of significant correlations. Significant  $p$ -values reported parenthetically.

|                               | <u>Male Pupae</u> |                          |               |                           | <u>Female Pupae</u> |                          |                          | <u>Overall</u> |
|-------------------------------|-------------------|--------------------------|---------------|---------------------------|---------------------|--------------------------|--------------------------|----------------|
|                               | <u>Line A</u>     | <u>Line B</u>            | <u>Line C</u> | <u>Overall</u>            | <u>Line A</u>       | <u>Line B</u>            | <u>Line C</u>            |                |
| Pupae → Egg Size <sup>a</sup> | 0.078             | +0.697<br><b>(0.019)</b> | 0.174         | +0.498<br><b>(0.0004)</b> | 0.059               | +0.754<br><b>(0.011)</b> | -0.638<br><b>(0.031)</b> | 0.062          |
| Egg size → Pupae <sup>b</sup> | 0.001             | -0.748<br><b>(0.026)</b> | 0.322         | 0.156                     | 0.146               | -0.668<br><b>(0.047)</b> | 0.518                    | 0.276          |

<sup>a</sup> Tests if pupal weight correlates with the egg size of offspring

<sup>b</sup> Tests if egg size correlates with the future pupal weight
